# Supplementary material for: In situ construction of heterostructured CuxO@NiCoS nanoarrays for alkaline overall water splitting
Source: Royal Society of Chemistry journal article supplement (doi:10.1039/d3se01194a), 2023-12-02
Supplement: d3se01194a1.pdf [file d3se01194a1.pdf]

## Supporting Information

### **In situ construction of heterostructured Cu<sub>x</sub>O@NiCoS nanoarrays for alkaline overall water splitting**

Chenyu Song,<sup>a</sup> Jishuang Yang,<sup>a</sup> Chinnadurai Ayappan,<sup>a</sup> Haitang Yang,<sup>c</sup> Ruimin Xing,<sup>\*a</sup> and Shanhu Liu<sup>b</sup>

a Henan Key Laboratory of Polyoxometalate Chemistry, School of Energy Science and Technology, Henan University, Zhengzhou, 450046, P. R. China

b College of Chemistry and Molecular Sciences, Henan University, Kaifeng, 475004, P. R. China

c Food and Pharmacy College, Xuchang University, Xuchang, 461000, P. R. China

\*E-mail: [rmxing@henu.edu.cn](mailto:rmxing@henu.edu.cn)

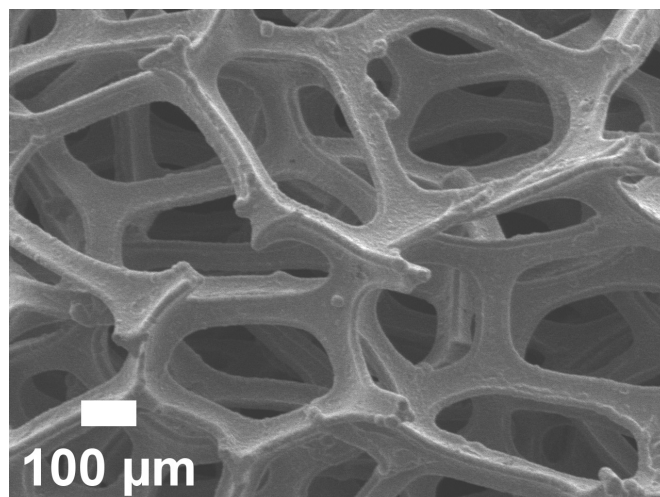

Fig. S1 SEM image of copper foam.

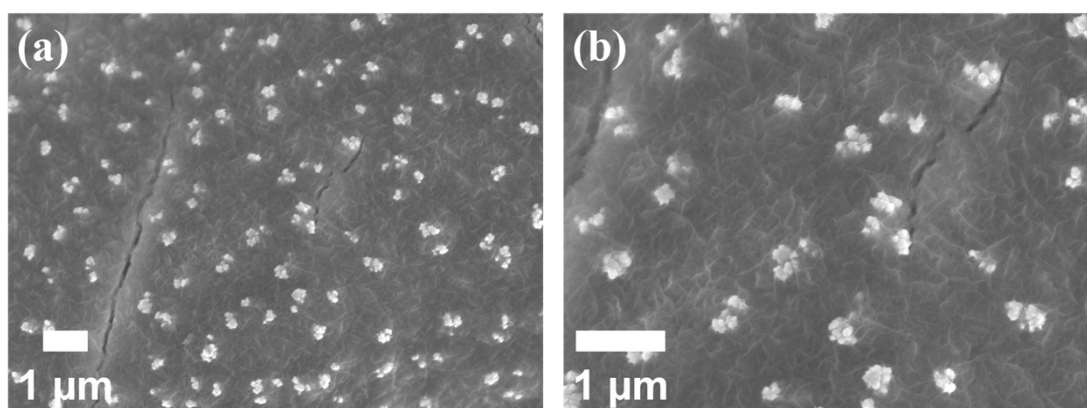

Fig. S2 SEM images of NiCoS/CF.

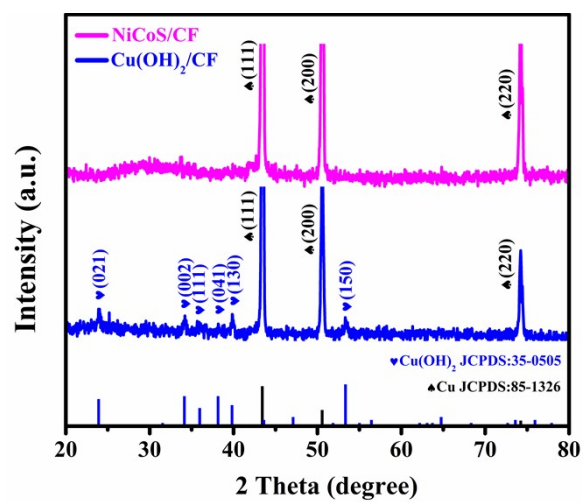

**Fig. S3** XRD patterns of  $\text{Cu}(\text{OH})_2/\text{CF}$  and  $\text{NiCoS}/\text{CF}$ .

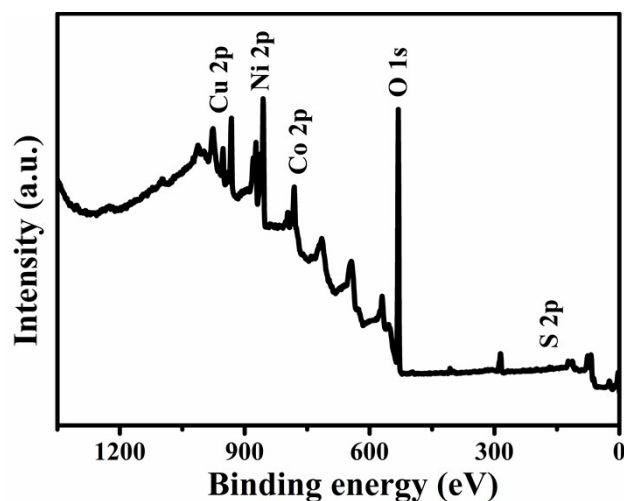

**Fig. S4** XPS survey spectrum of  $\text{Cu}_x\text{O}@\text{NiCoS}-1/\text{CF}$ .

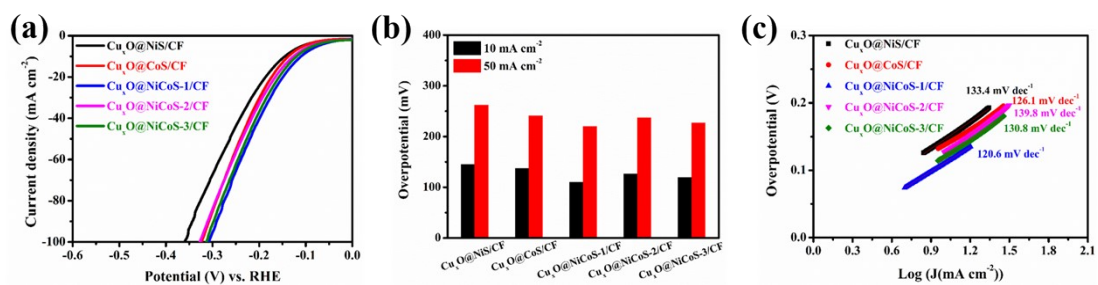

**Fig. S5** (a) HER polarization curves, (b) Required overpotentials at a current density of  $10 \text{ mA cm}^{-2}$  and  $50 \text{ mA cm}^{-2}$  and (c) Tafel plots of samples with different initial metal source ratios.

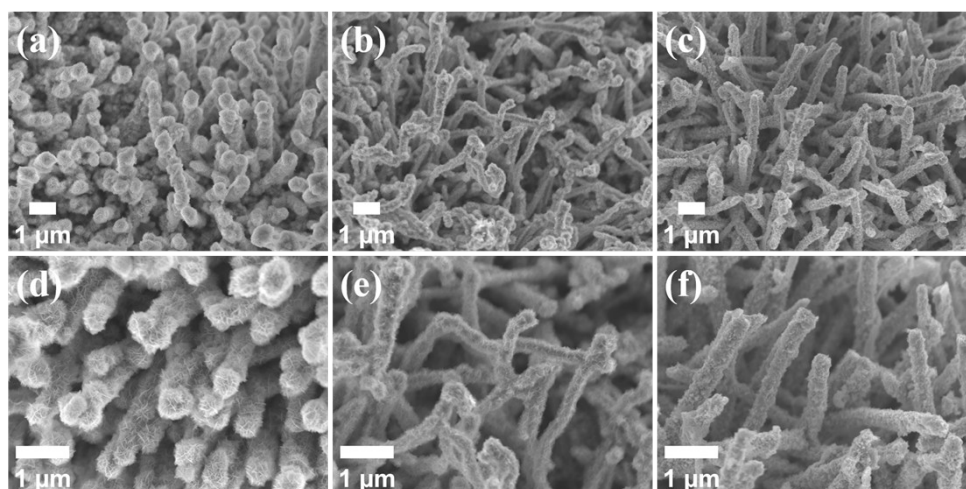

**Fig. S6** SEM images of  $\text{Cu}_x\text{O}@\text{NiCoS}-1$  (a and d),  $\text{Cu}_x\text{O}@\text{NiCoS}-2$  (b and e) and  $\text{Cu}_x\text{O}@\text{NiCoS}-3$  (c and f).

$\text{Cu}_x\text{O}@Ni\text{CoS}$ -3 (c and f).

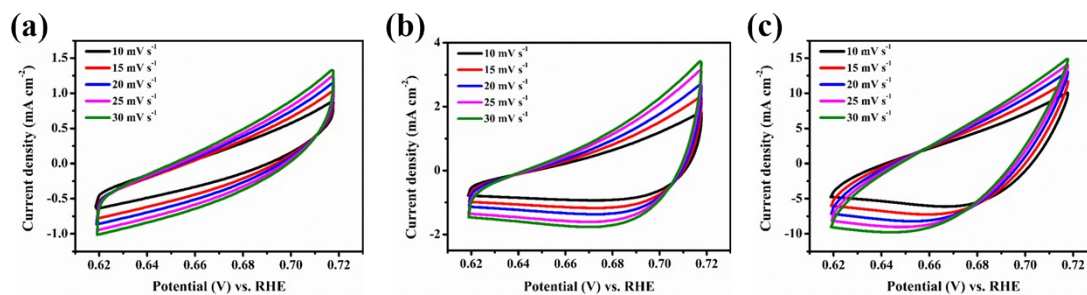

**Fig. S7** Cyclic voltammetry curves of (a)  $\text{Cu}_x\text{O}/\text{CF}$ , (b)  $\text{NiCoS}/\text{CF}$ , (c)  $\text{Cu}_x\text{O}@Ni\text{CoS}$ -1/CF in a potential range of 0.62 - 0.72 V (vs. RHE) with scan rates of 10, 15, 20, 25, 30  $\text{mV s}^{-1}$ .

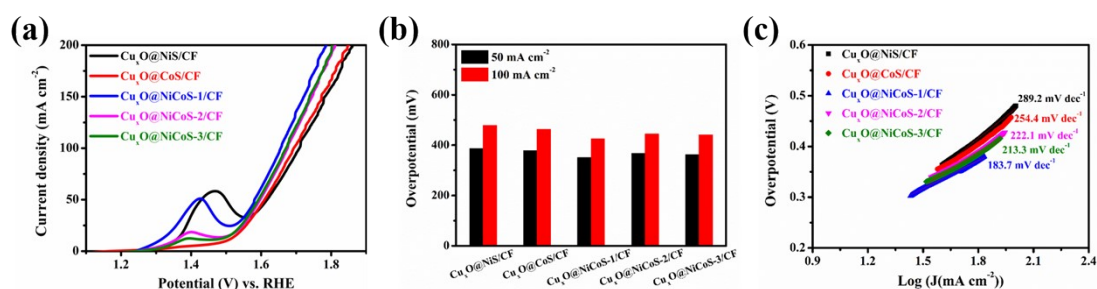

**Fig. S8** (a) OER polarization curves, (b) Required overpotentials at a current density of 50  $\text{mA cm}^{-2}$  and 100  $\text{mA cm}^{-2}$  and (c) Tafel plots of samples with different initial metal source ratios.

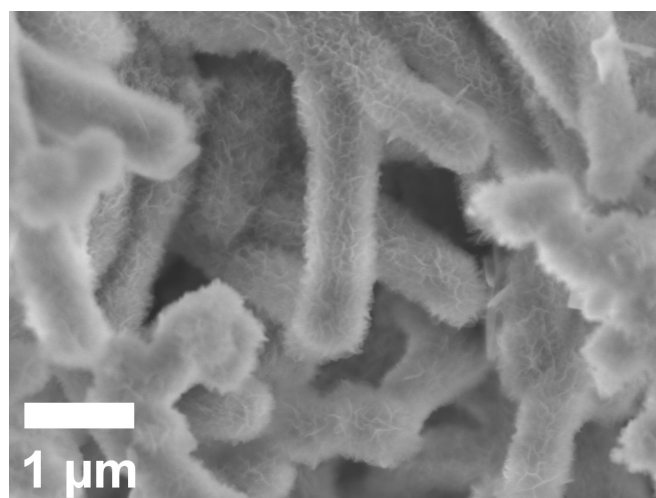

**Fig. S9** SEM image of  $\text{Cu}_x\text{O}@Ni\text{CoS}$ -1/CF after 60 h stability test.

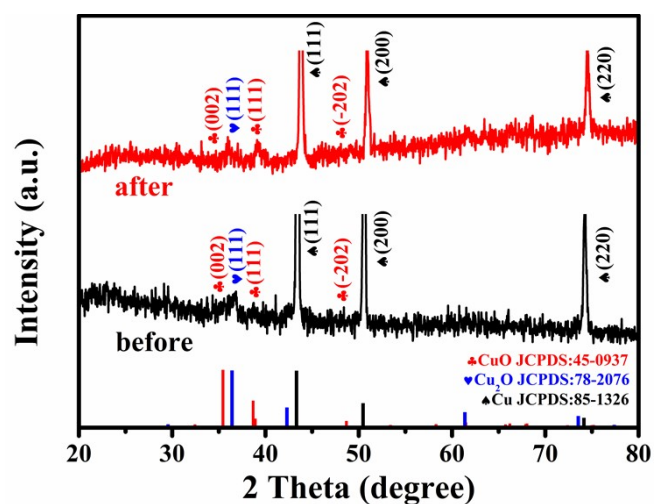

**Fig. S10** XRD patterns of  $\text{Cu}_x\text{O}@NiCoS-1/CF$  before and after 60 h stability test.

**Table S1** Comparison for overall water splitting performance of  $\text{Cu}_x\text{O}@NiCoS/CF$  in 1.0 M KOH with other recently reported electrocatalysts.

| Electrode                         | Voltage@10 mA cm <sup>-2</sup> (V) | Electrolyte | Reference                                       |
|-----------------------------------|------------------------------------|-------------|-------------------------------------------------|
| $\text{FeS}_2/\text{C}/\text{NF}$ | 1.72                               | 1.0 M KOH   | Dalton Trans. 2018, 47,<br>14917                |
| $\text{CoP}@NC$                   | 1.69                               | 1.0 M KOH   | Int. J. Hydrogen Energy<br>2021, 46, 2095-2102  |
| $\text{Bi}_2\text{Se}_3$          | 1.9                                | 1.0 M KOH   | Ceram. Int. 2021, 47,<br>26484-26491            |
| $\text{CNT}@NiSe/\text{SS}$       | 1.71                               | 1.0 M KOH   | J. Colloid Interface Sci.<br>2020, 574, 300-311 |
| La-NiFe LDH                       | 1.724                              | 1.0 M KOH   | Electrochim. Acta 2021,<br>390, 138824          |
| $\text{NiCoSe}_2@\text{PCM}$      | 1.73                               | 1.0 M KOH   | J. Electroanal. Chem.                           |

---

|                                                                    |      |           |                                       |
|--------------------------------------------------------------------|------|-----------|---------------------------------------|
|                                                                    |      |           | 2021, 897, 115568                     |
| Co/Mo <sub>2</sub> C-NCNTs                                         | 1.72 | 1.0 M KOH | ChemCatChem 2020, 12,<br>3737-3745    |
| Ni <sub>3</sub> S <sub>4</sub> /NiS <sub>2</sub> /FeS <sub>2</sub> | 1.68 | 1.0 M KOH | Appl. Surf. Sci. 2021,<br>560, 149985 |
| Cu <sub>x</sub> O@NiCoS/CF                                         | 1.67 | 1.0 M KOH | This work                             |

---
